# Supplementary material for: A comprehensive approach to developing a multi-epitope vaccine against Mycobacterium tuberculosis: from in silico design to in vitro immunization evaluation
Source: PubMed Central journal article supplement (PMC10652892; doi:10.3389/fimmu.2023.1280299), 2023-11-02
Supplement: Presentation_1.pdf [file Presentation_1.pdf]

# C-IMMSIM simulation results

February 7, 2023

## Abstract

This document includes the plots relative to the simulation and the outcome of the epitope/peptide prediction used.

Produced by the C-IMMSIM Online server available at <http://kraken.iac.rm.cnr.it/C-IMMSIM>

CITATIONS: For publication of results, please cite:

Nicolas Rapin, Ole Lund, Massimo Bernaschi, Filippo Castiglione. Computational Immunology Meets Bioinformatics: The Use of Prediction Tools for Molecular Binding in the Simulation of the Immune System. PLoS ONE 5(4): e9862. doi:10.1371/journal.pone.0009862, 2010.

Original C-IMMSIM model: [www.iac.cnr.it/~filippo/c-immsim](http://www.iac.cnr.it/~filippo/c-immsim)

GETTING HELP: Scientific problems: Filippo Castiglione (f dot castiglione at iac dot cnr dot it) Technical problems: Ilaria Gonnella (ilaria dot gonnella at cnr dot it)

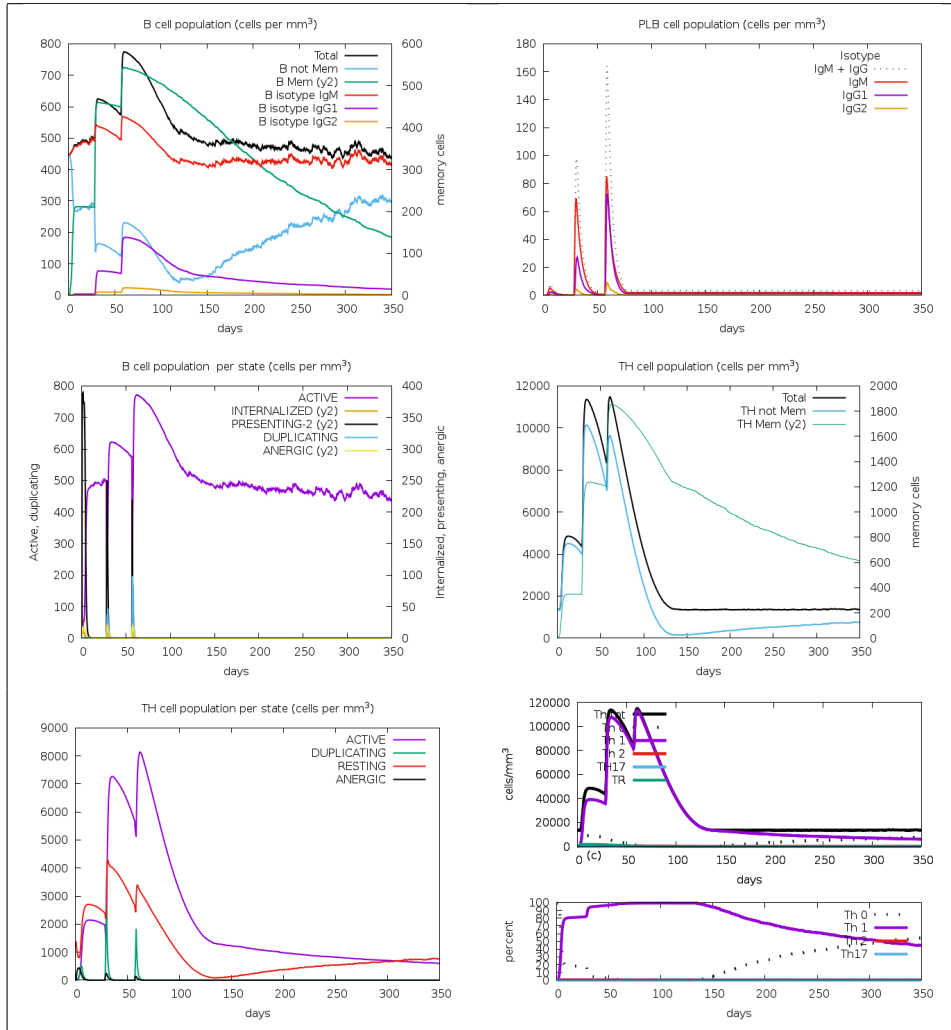

Figure 1: Cell counts shown. Legend: Act=active, Intern=internalized the Ag, Pres II = presenting on MHC II, Dup = in the mitotic cycle, Anergic = anergic, Resting = not active.

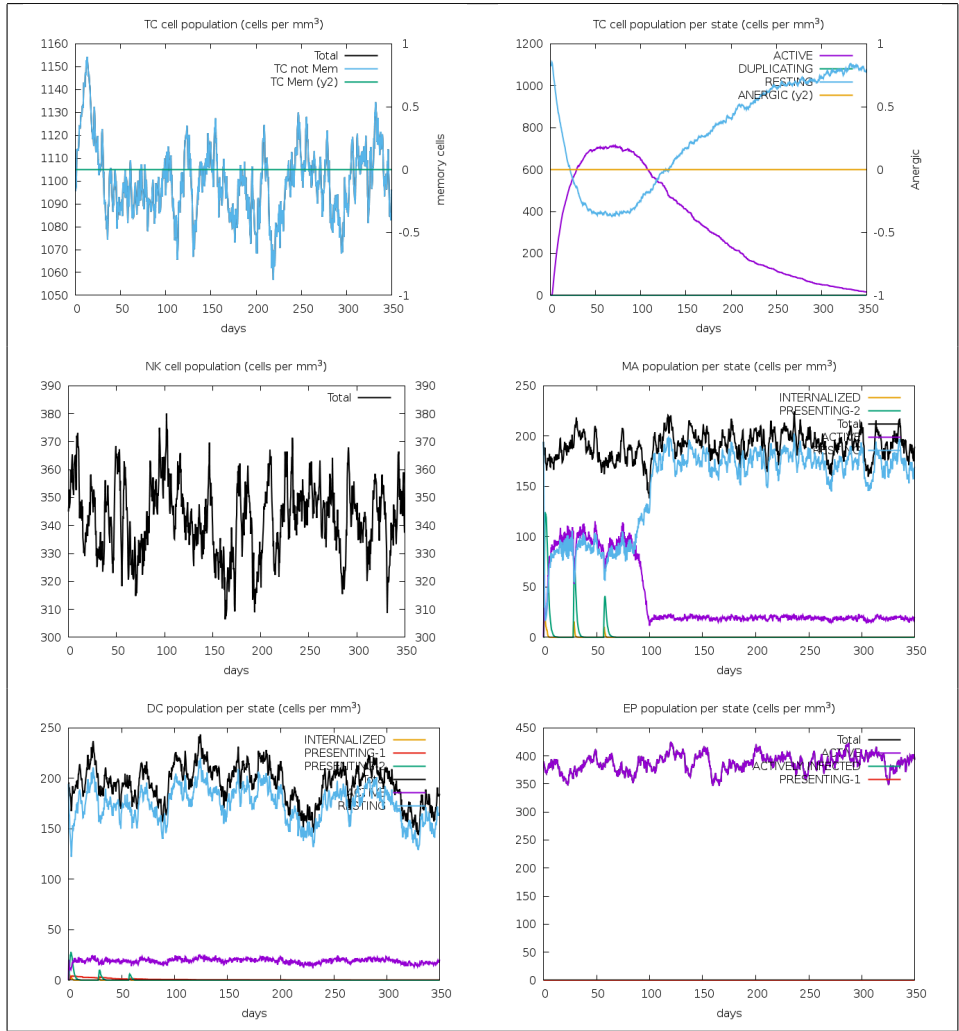

Figure 2: Legend: symbols as figure above.

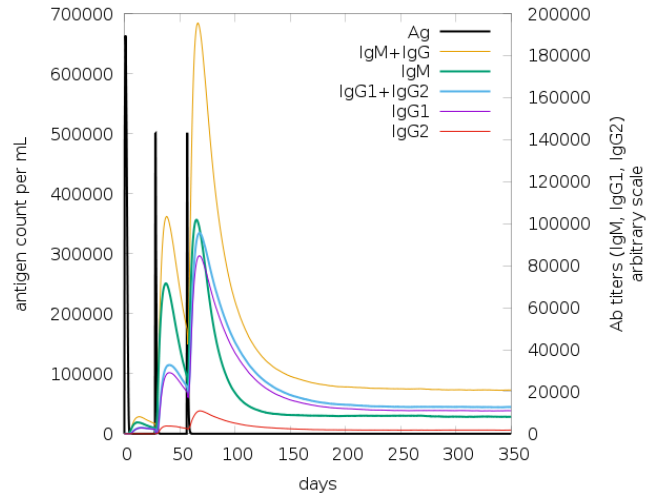

Figure 3: The virus, the immunoglobulins and the immunocomplexes.

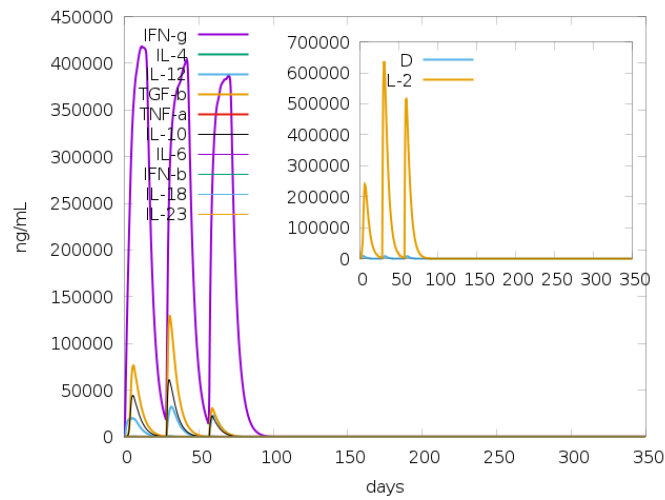

Figure 4: Concentration of cytokines and interleukins. Inset plot shows danger signal together with leukocyte growth factor IL-2.



RAGPGGAQGGYGAMALAAAFHGGPGMSDPAYNINISLPSYYPDGGPGGALSAGVAVAMSLTVGAGPGPGRRRSLRWSW  
LLSVLAAGPGGAEELTAAQVRVAAAAAYETAGPGPGYGYAAASAVAARLNPLGPGGTVGGAAPGGGAAAAVAHGPGPGV  
APSVMPAAAAGSSATGPGPGTGAVLGGGGIAMAAGPGGLLLVLAFAGGYAVAACAAAYGS AVVGLSMAAYNAAGGHNAVA  
AYTAAQAAVVRAAYAMSGDIVGAAAYRTADGINYRAAYAAIGGGVAVAAAYATATATATLAAYFLNLDVPLFVAAYQAETA  
VNTLAAAYAVNGEPAPLAAYGLSNATPREVAAYQVTRNRIKKAAYNLPPPLAPDFKAKFLEGFVRTSNIKFQDAYNKKAP  
DDPICTGGGNIMAHVS YVKKAGLSASSGLAHADSLASSASKKIGQAAEAMGNSRMFYNQYRSKKALGQTVQASDSLGTGAE  
ETLNKKVNTLFEKLEPMASILDGASKKAVGERVLATQGRGAWPVCGRKKAYHAMSSTHEANTMAMMARDEAAAKAPPHA  
LSHHHHHH

Epitopes of protein 0 -----

0] pos= 453 score=0.000978 unnormalised=0.102600000 TATATLAAY  
1] pos= -1 score=0.999022 unnormalised=104.841000000 non-binding event

Allele: A0201

Pseudo sequence: KAAHVEQRKAQTRTV

Threshold: 9.523800

Max score: 27.437000

Antigen sequence file: /opt/lampp/htdocs/C-IMMSIM/Jobs/input/9107\_20230207-091852\_5\_5fvJbmMTm4C6.FSA\_1\_001

IALTALPVAAMADVTLTYGTIKAGVETSRVAVHNGAQAASVETGTGIVDLGSKIGFKGQEDLGNGLKAIWQVEQEA  
AGLFQRHGEGTKATVGEVPGPGPTGS AVVGLSMAASSALTLGPGGAAIGLSMAGSSAMILAAGPGPGTNI  
RAGPGGAQGGYGAMALAAAFHGGPGMSDPAYNINISLPSYYPDGGPGGALSAGVAVAMSLTVGAGPGPGR  
RRSLRWSW LLSVLAAGPGGAEELTAAQVRVAAAAAYETAGPGPGYGYAAASAVAARLNPLGPGGTVGGA  
APGGGAAAAVAHGPGPGV APSVMPAAAAGSSATGPGPGTGAVLGGGGIAMAAGPGGLLLVLAFAGGYAV  
AACAAAYGS AVVGLSMAAYNAAGGHNAVA  
AYTAAQAAVVRAAYAMSGDIVGAAAYRTADGINYRAAYAAIGGGVAVAAAYATATATATLAAYFLNLDV  
PLFVAAYQAETA VNTLAAAYAVNGEPAPLAAYGLSNATPREVAAYQVTRNRIKKAAYNLPPPLAPDFK  
AKFLEGFVRTSNIKFQDAYNKKAP  
DDPICTGGGNIMAHVS YVKKAGLSASSGLAHADSLASSASKKIGQAAEAMGNSRMFYNQYRSKKALGQ  
TVQASDSLGTGAE ETLNKKVNTLFEKLEPMASILDGASKKAVGERVLATQGRGAWPVCGRKKAYHAMS  
STHEANTMAMMARDEAAAKAPPHA  
LSHHHHHH

Epitopes of protein 0 -----

0] pos= 132 score=0.006134 unnormalised=0.686200000 SMAGSSAMI  
1] pos= 185 score=0.005848 unnormalised=0.654200000 GMSDPAYNI  
2] pos= 209 score=0.008833 unnormalised=0.988200000 ALSAGVGAV  
3] pos= 457 score=0.019507 unnormalised=2.182200000 TLAAAYFLNL  
4] pos= 569 score=0.019605 unnormalised=2.193200000 NIMAHVS YV  
5] pos= 648 score=0.002907 unnormalised=0.325200000 TLFEKLEPM  
6] pos= -1 score=0.937166 unnormalised=104.841000000 non-binding event

Allele: B0702

Pseudo sequence: KAAREEQIKAQTRE

Threshold: 8.702800

Max score: 28.406000

Antigen sequence file: /opt/lampp/htdocs/C-IMMSIM/Jobs/input/9107\_20230207-091852\_5\_5fvJbmMTm4C6.FSA\_1\_001

IALTALPVAAMADVTLTYGTIKAGVETSRVAVHNGAQAASVETGTGIVDLGSKIGFKGQEDLGNGLKAIWQVEQEA  
AGLFQRHGEGTKATVGEVPGPGPTGS AVVGLSMAASSALTLGPGGAAIGLSMAGSSAMILAAGPGPGTNI  
RAGPGGAQGGYGAMALAAAFHGGPGMSDPAYNINISLPSYYPDGGPGGALSAGVAVAMSLTVGAGPGPGR  
RRSLRWSW LLSVLAAGPGGAEELTAAQVRVAAAAAYETAGPGPGYGYAAASAVAARLNPLGPGGTVGGA  
APGGGAAAAVAHGPGPGV APSVMPAAAAGSSATGPGPGTGAVLGGGGIAMAAGPGGLLLVLAFAGGYAV  
AACAAAYGS AVVGLSMAAYNAAGGHNAVA  
AYTAAQAAVVRAAYAMSGDIVGAAAYRTADGINYRAAYAAIGGGVAVAAAYATATATATLAAYFLNLDV  
PLFVAAYQAETA VNTLAAAYAVNGEPAPLAAYGLSNATPREVAAYQVTRNRIKKAAYNLPPPLAPDFK  
AKFLEGFVRTSNIKFQDAYNKKAP  
DDPICTGGGNIMAHVS YVKKAGLSASSGLAHADSLASSASKKIGQAAEAMGNSRMFYNQYRSKKALGQ  
TVQASDSLGTGAE ETLNKKVNTLFEKLEPMASILDGASKKAVGERVLATQGRGAWPVCGRKKAYHAMS  
STHEANTMAMMARDEAAAKAPPHA  
LSHHHHHH

ETLNKKVNTLFEKLEPMASILDPGASKKAVGERVLATQGRGAWPVCGRKKAYHAMSSTHEANTMAMMARDEAAAKAPPHA  
LSHHHHHH

Epitopes of protein 0 -----

|     |          |                |                             |                   |
|-----|----------|----------------|-----------------------------|-------------------|
| 0]  | pos= 7   | score=0.004079 | unnormalised=0.5162000000   | LPVAAMADV         |
| 1]  | pos= 99  | score=0.012274 | unnormalised=1.5532000000   | GPGPGTGSA         |
| 2]  | pos= 101 | score=0.001977 | unnormalised=0.2502000000   | GPGTGSAVV         |
| 3]  | pos= 113 | score=0.010915 | unnormalised=1.3812000000   | MAASSALTL         |
| 4]  | pos= 204 | score=0.005549 | unnormalised=0.7022000000   | GPGPGALSA         |
| 5]  | pos= 282 | score=0.002040 | unnormalised=0.2582000000   | AVAARLNPL         |
| 6]  | pos= 302 | score=0.026720 | unnormalised=3.3812000000   | APGGGAAAA         |
| 7]  | pos= 316 | score=0.006252 | unnormalised=0.7912000000   | GPGVAPSVM         |
| 8]  | pos= 320 | score=0.031019 | unnormalised=3.9252000000   | APSVMPAAA         |
| 9]  | pos= 324 | score=0.031264 | unnormalised=3.9562000000   | MPAAAAGSS         |
| 10] | pos= 335 | score=0.027984 | unnormalised=3.5412000000   | GPGPGTGAV         |
| 11] | pos= 525 | score=0.000081 | unnormalised=0.0102000000   | LPPPLAPDF         |
| 12] | pos= 712 | score=0.011334 | unnormalised=1.4342000000   | AAKAPPHAL         |
| 13] | pos= -1  | score=0.828510 | unnormalised=104.8410000000 | non-binding event |

=====

Allele: B0801  
Pseudo sequence: KAAREEQIKAQTRE  
Threshold: 8.405400  
Max score: 30.890000

-----  
Antigen sequence file: /opt/lampp/htdocs/C-IMMSIM/Jobs/input/9107\_20230207-091852\_5\_5fvJbmMTm4C6.FSA\_1\_001  
-----

IALTALPVAAMADVTLTYGTIKAGVETSRVSAHNGAQAASVETGTGIVDLGSKIGFKGQEDLGNLKAIWQVEQEAAAK  
AGLFQRHGEGETKATVGEVPGPGTGSVAVGLSMAASSALTLGPGGAAIGLSMAGSSAMILAAGPGPTNIRQAGVQYS  
RAGPGPGAQGGYGAMALAAAFHGPMSDPAYNINISLPSYYPDGPAGALSAGVAVAMSLTVGAGPGPGRRLRWSW  
LLSVLAAGPGGAELTAAQVRVAAAAAYETAGPGPGYGYAAASAVAARLNPLGPGTGVGAAPGGGAAAAVAHGPGPGV  
APSVMPAAAAGSSATGPGPGTGAVLGGGGIAMAAGPGPGLLLVLAFAAGGYAVAACAAYGSVAVGLSMAAYNAAGGHNAVA  
AYTAAQAQAVVRAAYAMSGDIVGAAAYRTADGINYRAAYAAIGGGVAVAAATATATATLAAYFLNLDVPLFVAAYQAETA  
VNTLAAAYAVNGEPAPLAAYGLSNATPREVAAYQVTRNRIKKAAYNLPPPLAPDFKAKFLEGFVRTSNIKFKQDAYNKKAP  
DDP ICTGGG NIMAHVSYVKKAGLSASSGLAHADSLASSASKKIGQAAEAMGNSRMFYNQYRSKKALGQTVQASDSL TGAE  
ETLNKKVNTLFEKLEPMASILDPGASKKAVGERVLATQGRGAWPVCGRKKAYHAMSSTHEANTMAMMARDEAAAKAPPHA  
LSHHHHHH

Epitopes of protein 0 -----

|    |          |                |                             |                   |
|----|----------|----------------|-----------------------------|-------------------|
| 0] | pos= 282 | score=0.003797 | unnormalised=0.4096000000   | AVAARLNPL         |
| 1] | pos= 641 | score=0.020703 | unnormalised=2.2336000000   | TLNKKVNTL         |
| 2] | pos= 712 | score=0.003732 | unnormalised=0.4026000000   | AAKAPPHAL         |
| 3] | pos= -1  | score=0.971769 | unnormalised=104.8410000000 | non-binding event |

DoPeptideList\_II:

Given the antigen injected creates the list of peptides for all the  
NumAgProts proteins and for all i.e., 2 MHCII molecules

Read class II peptide list from file? NO

=====

Allele: DRB1\_0101  
Pseudo sequence: KFAHVEQRKAQTRV  
Threshold: 2.392440  
Max score: 26.461000

-----  
Antigen sequence file: /opt/lampp/htdocs/C-IMMSIM/Jobs/input/9107\_20230207-091852\_5\_5fvJbmMTm4C6.FSA\_1\_001  
-----

IALTLAALPVAAMADVTLTYGTIKAGVETSRVAVHNGAQAASVETGTGIVDLGSKIGFKGQEDLGNGLKAIWQVEQEAAAK  
AGLFQRHGEKTKATVGEVPGPGPTGSVAVGLSMAASSALTLGPGGAAIGLSMAGSSAMILAAGPGPGTNRQAGVQYS  
RAGPGPGAQGGYGAMALAAFHGPGPGMSDPAYNINISLPSYYPDGPGLSAGVAVAMSLTVGAGPGPGRRRSLRWSW  
LLSVLAAGPGPGAELTAAQVRVAAAAYETAGPGPGYGYAAASAVAARLNPLGPGGTVGGAAPGGGAAAAVAHGPVGPV  
APSVMPAAAAGSSATGPGGTGAVLGGGGIAMAAGPGPGLLLVLAFAAGGYAVAACAAVGSVAVGLSMAAYNAAGGHNAVA  
AYTAAQAAVVRAAYAMSGDIVGAAAYRTADGINYRAAYAAIGGGVAVAAATATATATLAAYFLNLDVPLFVAAYQAETA  
VNTLAAAYAVNGEPAPLAAAYGLSNATPREVAAYQVTRNRIKKAAYNLPPPLAPDFKAKFLEGFVRTSNIKFDAYNKKAP  
DDPICTGGGNIMAHVSVYKKAGLSASSGLAHADSLASSAKKIGQAAEAMGNSRMFYNQYRSKKALGQTVQASDSLGTAE  
ETLNKKVNTLFEKLEPMASILDPGASKKAVGERVLATQGRGAWPVCGRKKAYHAMSSTHEANTMAMMARDEAAAKAPPHA  
LSHHHHHH

Epitopes of protein 0 -----

|     |      |     |                |                            |           |
|-----|------|-----|----------------|----------------------------|-----------|
| 0]  | pos= | 1   | score=0.000194 | unnormalised=0.0685600000  | ALTLAALPV |
| 1]  | pos= | 4   | score=0.014020 | unnormalised=4.9635600000  | LAALPVAAM |
| 2]  | pos= | 9   | score=0.005857 | unnormalised=2.0735600000  | VAAMADVTL |
| 3]  | pos= | 31  | score=0.012947 | unnormalised=4.5835600000  | VAHNGAQAA |
| 4]  | pos= | 72  | score=0.010433 | unnormalised=3.6935600000  | VEQEAAAKA |
| 5]  | pos= | 108 | score=0.007058 | unnormalised=2.4985600000  | VVGLSMAAS |
| 6]  | pos= | 110 | score=0.004304 | unnormalised=1.5235600000  | GLSMAASSA |
| 7]  | pos= | 111 | score=0.031963 | unnormalised=11.3155600000 | LSMAASSAL |
| 8]  | pos= | 113 | score=0.016613 | unnormalised=5.8815600000  | MAASSALTL |
| 9]  | pos= | 119 | score=0.006625 | unnormalised=2.3455600000  | LTLGPGPGA |
| 10] | pos= | 121 | score=0.001609 | unnormalised=0.5695600000  | LGPGGAAI  |
| 11] | pos= | 130 | score=0.001516 | unnormalised=0.5365600000  | GLSMAGSSA |
| 12] | pos= | 131 | score=0.026878 | unnormalised=9.5155600000  | LSMAGSSAM |
| 13] | pos= | 133 | score=0.014170 | unnormalised=5.0165600000  | MAGSSAMIL |
| 14] | pos= | 140 | score=0.003450 | unnormalised=1.2215600000  | ILAAGPGPG |
| 15] | pos= | 141 | score=0.009555 | unnormalised=3.3825600000  | LAAGPGPGT |
| 16] | pos= | 156 | score=0.002838 | unnormalised=1.0045600000  | VQYSRAGPG |
| 17] | pos= | 158 | score=0.015950 | unnormalised=5.6465600000  | YSRAGPGPG |
| 18] | pos= | 171 | score=0.004476 | unnormalised=1.5845600000  | YGAMALAAF |
| 19] | pos= | 179 | score=0.011941 | unnormalised=4.2275600000  | FHGPVPGMS |
| 20] | pos= | 191 | score=0.018582 | unnormalised=6.5785600000  | YNINISLPS |
| 21] | pos= | 237 | score=0.039120 | unnormalised=13.8495600000 | WSWLLSVLA |
| 22] | pos= | 241 | score=0.007086 | unnormalised=2.5085600000  | LSVLAAGPG |
| 23] | pos= | 244 | score=0.009134 | unnormalised=3.2335600000  | LAAGPGPGA |
| 24] | pos= | 266 | score=0.008930 | unnormalised=3.1615600000  | YETAGPGPG |
| 25] | pos= | 275 | score=0.030316 | unnormalised=10.7325600000 | YGYAAASAV |
| 26] | pos= | 277 | score=0.035061 | unnormalised=12.4125600000 | YAAASAVAA |
| 27] | pos= | 287 | score=0.007552 | unnormalised=2.6735600000  | LNPLGPGPG |
| 28] | pos= | 311 | score=0.007860 | unnormalised=2.7825600000  | VAHGPVGPV |
| 29] | pos= | 323 | score=0.009628 | unnormalised=3.4085600000  | VMPAAAAGS |
| 30] | pos= | 351 | score=0.010580 | unnormalised=3.7455600000  | MAAGPGPGL |
| 31] | pos= | 359 | score=0.009139 | unnormalised=3.2355600000  | LLLVLAFAF |
| 32] | pos= | 363 | score=0.014619 | unnormalised=5.1755600000  | LAFAGGYAV |
| 33] | pos= | 365 | score=0.017562 | unnormalised=6.2175600000  | FAGGYAVAA |
| 34] | pos= | 371 | score=0.002936 | unnormalised=1.0395600000  | VAACAAVGS |
| 35] | pos= | 384 | score=0.005933 | unnormalised=2.1005600000  | LSMAAYNAA |
| 36] | pos= | 389 | score=0.025203 | unnormalised=8.9225600000  | YNAAGGHNA |
| 37] | pos= | 401 | score=0.026867 | unnormalised=9.5115600000  | YTAAQAAVV |
| 38] | pos= | 409 | score=0.011650 | unnormalised=4.1245600000  | VRAAYAMSG |
| 39] | pos= | 419 | score=0.026822 | unnormalised=9.4955600000  | IVGAAAYRT |
| 40] | pos= | 431 | score=0.011215 | unnormalised=3.9705600000  | INYRAAYAA |
| 41] | pos= | 433 | score=0.022373 | unnormalised=7.9205600000  | YRAAYAAIG |
| 42] | pos= | 437 | score=0.016082 | unnormalised=5.6935600000  | YAAIGGGVA |
| 43] | pos= | 449 | score=0.027282 | unnormalised=9.6585600000  | YATATATAT |
| 44] | pos= | 461 | score=0.002818 | unnormalised=0.9975600000  | YFLNLDVPL |
| 45] | pos= | 470 | score=0.003572 | unnormalised=1.2645600000  | FVAAYQAET |
| 46] | pos= | 474 | score=0.023669 | unnormalised=8.3795600000  | YQAETAVNT |



|     |          |                |                            |                   |
|-----|----------|----------------|----------------------------|-------------------|
| 47] | pos= 480 | score=0.032914 | unnormalised=11.6525600000 | VNTLAAYAV         |
| 48] | pos= 488 | score=0.017385 | unnormalised=6.1545600000  | VNGEPAPLA         |
| 49] | pos= 498 | score=0.000233 | unnormalised=0.0825600000  | YGLSNATPR         |
| 50] | pos= 500 | score=0.008334 | unnormalised=2.9505600000  | LSNATPREV         |
| 51] | pos= 522 | score=0.002182 | unnormalised=0.7725600000  | AYNLPPPLA         |
| 52] | pos= 523 | score=0.007651 | unnormalised=2.7085600000  | YNLPPPLAP         |
| 53] | pos= 542 | score=0.008800 | unnormalised=3.1155600000  | FVRTSNIKF         |
| 54] | pos= 550 | score=0.000137 | unnormalised=0.0485600000  | FQDAYNKKA         |
| 55] | pos= 563 | score=0.000674 | unnormalised=0.2385600000  | ICTGGGNIM         |
| 56] | pos= 576 | score=0.012190 | unnormalised=4.3155600000  | YVKKAGLSA         |
| 57] | pos= 588 | score=0.011769 | unnormalised=4.1665600000  | LAHADSLAS         |
| 58] | pos= 594 | score=0.010521 | unnormalised=3.7245600000  | LASSASKKI         |
| 59] | pos= 606 | score=0.000527 | unnormalised=0.1865600000  | AEAMGNSRM         |
| 60] | pos= 616 | score=0.014097 | unnormalised=4.9905600000  | YNQYRSKKA         |
| 61] | pos= 650 | score=0.029994 | unnormalised=10.6185600000 | FEKLEPMAS         |
| 62] | pos= 653 | score=0.001259 | unnormalised=0.4455600000  | LEPMASILD         |
| 63] | pos= 673 | score=0.001459 | unnormalised=0.5165600000  | VLATQGRGA         |
| 64] | pos= 691 | score=0.018983 | unnormalised=6.7205600000  | YHAMSSTHE         |
| 65] | pos= -1  | score=0.186902 | unnormalised=66.1680000000 | non-binding event |

=====

Allele: DRB1\_1501  
Pseudo sequence: RVTLGRDASW  
Threshold: 3.125180  
Max score: 28.118000

-----  
Antigen sequence file: /opt/lampp/htdocs/C-IMMSIM/Jobs/input/9107\_20230207-091852\_5\_5fvJbmMtM4C6.FSA\_1\_001  
-----

IALLTLAALPVAAMADVTLTYGTIKAGVETSRVAHNGAQAASVETGTGIVDLGSKIGFKGQEDLGNLKAIWQVEQEA  
AGLFQRHGEGTKATVGPVPGPGTGSVAVGLSMAASSALTLGPGGAAIGLSMAGSSAMILAAGPGPGTNRQAGVQYS  
RAGPGPGAQGGYGAMALAAFHGPGGMSDPAYNINISLPSYYPDGGPGGALSAGVAVAMSLTVGAGPGPGRRLRWSW  
LLSVLAAGPGPGAELTAAQVRVAAAAYETAGPGPGYGYAAASVAARLNPLGPGGTVGGAAPGGAAAAVAHGP  
APSVMPAAAAGSSATGPGGTGAVLGGGGIAMAAGPGPGLLLVLAFAAGYAVAACAAYGSVAVGLSMAAYNAAGGHNAVA  
AYTAAQAQAVVRAAYAMSGDIVGAAAYRTADGINYRAAYAAIGGGVAVAAAYATATATLAAYFLNLDVPLFVAAYQAETA  
VNTLAAYAVNGEPAPLAAYGLSNATPREVAAYQVTRNRIKKAAYNLPPPLAPDFKKAKFLEGFVRTSNIKFQDAYNKKAP  
DDPICTGGGNIMAHVSYVKKAGLSASSGLAHADSLASSASKKIGQAAEAMGNSRMFYNQYRSKKALGQTVQASD  
ETLNKRVNTLFEKLEPMASILDPGASKKAVGERVLATQGRGAWPVCGRKKAYHAMSSTHEANTMAMMARDEAAAKAPPHA  
LSHHHHHH

Epitopes of protein 0 -----

|     |          |                |                           |               |
|-----|----------|----------------|---------------------------|---------------|
| 0]  | pos= 9   | score=0.015642 | unnormalised=2.2588200000 | VAAMADVTL     |
| 1]  | pos= 15  | score=0.030772 | unnormalised=4.4438200000 | VTLTYTIKA     |
| 2]  | pos= 25  | score=0.036035 | unnormalised=5.2038200000 | VETSRVAH      |
| 3]  | pos= 108 | score=0.028023 | unnormalised=4.0468200000 | VVGLSMAAS     |
| 4]  | pos= 113 | score=0.032420 | unnormalised=4.6818200000 | MAASSALTL     |
| 5]  | pos= 119 | score=0.001799 | unnormalised=0.2598200000 | LTLP<br>GPGGA |
| 6]  | pos= 133 | score=0.011570 | unnormalised=1.6708200000 | MAGSSAMIL     |
| 7]  | pos= 141 | score=0.001065 | unnormalised=0.1538200000 | LAAGPGPGT     |
| 8]  | pos= 156 | score=0.019436 | unnormalised=2.8068200000 | VQYSRAGPG     |
| 9]  | pos= 237 | score=0.048658 | unnormalised=7.0268200000 | WSWLLSVLA     |
| 10] | pos= 311 | score=0.004174 | unnormalised=0.6028200000 | VAHGP<br>GPGV |
| 11] | pos= 359 | score=0.000580 | unnormalised=0.0838200000 | LLLVLAFAG     |
| 12] | pos= 362 | score=0.011591 | unnormalised=1.6738200000 | VLAFA<br>GGYA |
| 13] | pos= 374 | score=0.012512 | unnormalised=1.8068200000 | CAAYGS<br>AVV |
| 14] | pos= 419 | score=0.004465 | unnormalised=0.6448200000 | IVGAA<br>YRT  |
| 15] | pos= 431 | score=0.002409 | unnormalised=0.3478200000 | INYRA<br>AYAA |
| 16] | pos= 446 | score=0.014125 | unnormalised=2.0398200000 | VAAYAT<br>ATA |
| 17] | pos= 471 | score=0.014201 | unnormalised=2.0508200000 | VAAYQ<br>AETA |
| 18] | pos= 480 | score=0.047350 | unnormalised=6.8378200000 | VNTLA<br>AYAV |
| 19] | pos= 495 | score=0.010220 | unnormalised=1.4758200000 | LAAYG<br>LSNA |
| 20] | pos= 570 | score=0.057467 | unnormalised=8.2988200000 | IMAHV<br>SYVK |

|     |          |                |                            |                   |
|-----|----------|----------------|----------------------------|-------------------|
| 21] | pos= 582 | score=0.027787 | unnormalised=4.0128200000  | LSASSGLAH         |
| 22] | pos= 591 | score=0.012747 | unnormalised=1.8408200000  | ADSLASSAS         |
| 23] | pos= 606 | score=0.017400 | unnormalised=2.5128200000  | AEAMGNSRM         |
| 24] | pos= 612 | score=0.037904 | unnormalised=5.4738200000  | SRMFYNQYR         |
| 25] | pos= 616 | score=0.023764 | unnormalised=3.4318200000  | YNQYRSKKA         |
| 26] | pos= 653 | score=0.017691 | unnormalised=2.5548200000  | LEPMASILD         |
| 27] | pos= -1  | score=0.458192 | unnormalised=66.1680000000 | non-binding event |

---
